# Supplementary material
Source: MDPI journal article supplement (https://www.mdpi.com/2073-4433/7/8/99)

# Supplementary Materials: Effects of Aerosols on Radiative Forcing and Climate over East Asia with Different SO<sub>2</sub> Emissions. *Atmosphere* 2016, 7, doi:10.3390/atmos7080099

Xiaoning Xie, Xiaodong Liu, Hongli Wang and Zhaosheng Wang

This supplementary material includes a figure about the changes induced by aerosols in cloud amount including low cloud cover, mid-level cloud cover, high cloud cover and total cloud cover (Figure S1).

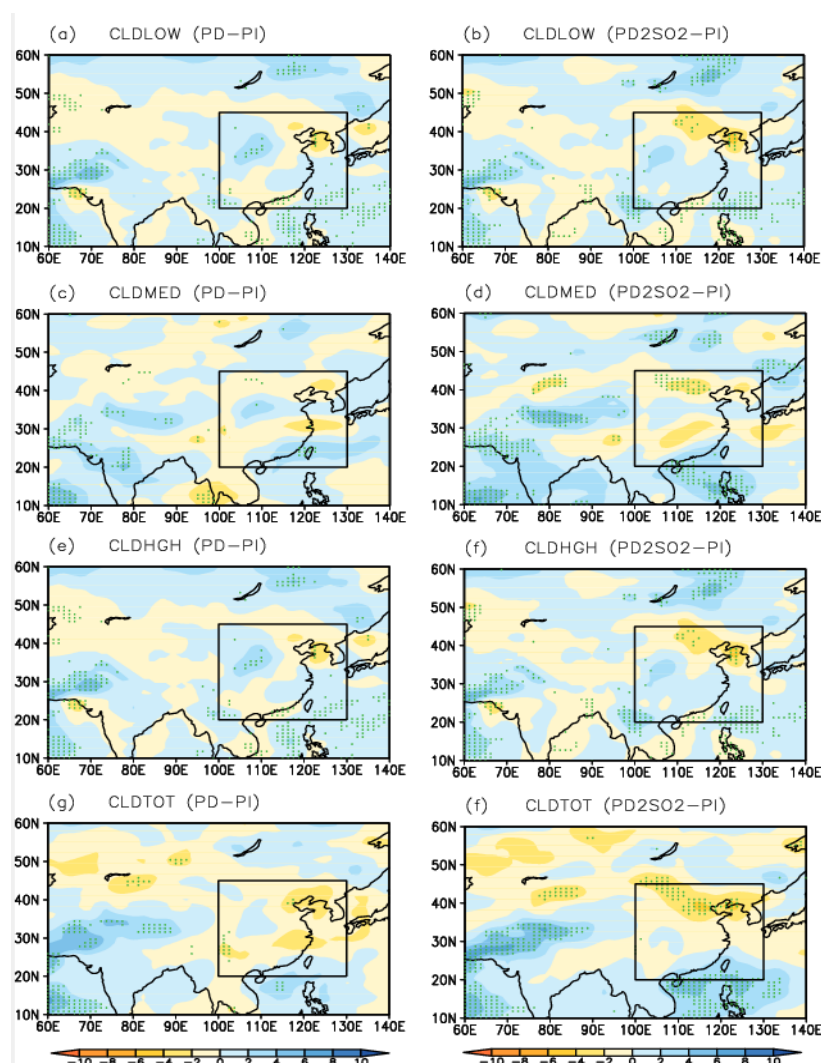

**Figure S1.** Difference in the cloud amount (%) including low cloud cover (CLDLOW), mid-level cloud cover (CLDMED), high cloud cover (CLDHGH) and total cloud cover (CLDTOT) for PD-PI and for PD2SO2-PI. The dots represent the grid points where the changes pass the two-tailed t-test at the 5% significance level. The box indicates the East Asian region defined in this study (20°N–45°N, 100°E–130°E).

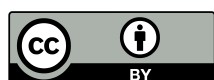

Supplement: s1 [file s1]
